# Supplementary material for: Identification of SCARA3 with potential roles in metabolic disorders
Source: PubMed Central journal article supplement (PMC7880357; doi:10.18632/aging.202228), 2020-12-09
Supplement: aging-13-202228-s001.pdf [file aging-13-202228-s001.pdf]

## SUPPLEMENTARY FIGURES

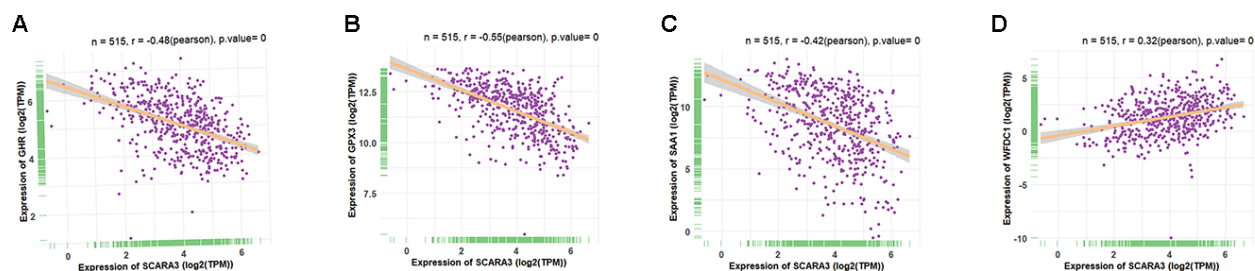

**Supplementary Figure 1. Co-expression of *SCARA3* with four shared genes in adipose tissue.** (A–D) Correlation of *SCARA3* with *GHR* (A), *GPX3* (B), *SAA1* (C), and *WFDC1* (D) expression in adipose tissue, based on data from the GTEx databases, respectively.

Factors predicted within a dissimilarity margin less or equal than 15 % :

|                        |                                  |                                |                         |
|------------------------|----------------------------------|--------------------------------|-------------------------|
| 6 GR-beta [T01920]     | 1 TFII-I [T00824]                | 2 GR-alpha [T00337]            | 3 C/EBPbeta [T00581]    |
| 8 YY1 [T00915]         | 9 XBP-1 [T00902]                 | 10 ENKTF-1 [T00255]            | 11 GR [T05076]          |
| 16 AR [T00040]         | 17 AP-2alphaA [T00035]           | 18 PU.1 [T02068]               | 19 STAT4 [T01577]       |
| 24 LEF-1 [T02905]      | 25 PEA3 [T00685]                 | 26 NF-AT2 [T01945]             | 27 STAT1beta [T01573]   |
| 32 NF-AT1 [T01948]     | 33 RBP-Jkappa [T01616]           | 34 VDR [T00885]                | 35 PXR-1:RXR-alpha [T0  |
| 40 NF-Y [T00150]       | 41 NF1/CTF [T00094]              | 42 RAR-beta [T00721]           | 43 HOXD9 [T01424]       |
| 48 GATA-1 [T00306]     | 49 Iκ-1 [T02702]                 | 50 c-Jun [T00133]              | 51 USF2 [T00878]        |
| 56 HNF-4alpha [T03828] | 57 MAZ [T00490]                  | 58 RAR-beta:RXR-alpha [T05420] | 59 POU2F2 (Oct-2.1) [T0 |
| 64 ETF [T00270]        | 65 PPAR-alpha:RXR-alpha [T05221] | 66 E2F-1 [T01542]              | 67 GCF [T00320]         |
| 72 IRF-1 [T00423]      | 73 NF-AT1 [T00550]               | 74 IRF-2 [T01491]              | 75 TBP [T00794]         |

**Supplementary Figure 2. Predictions of transcriptional factors of *SCARA3* in PROMO databases.**
